# Supplementary material for: Energy consumption and cooperation for optimal sensing
Source: PubMed Central journal article supplement (PMC7033096; doi:10.1038/s41467-020-14806-y), 2020-02-20
Supplement: 41467_2020_14806_MOESM1_ESM.pdf [file 41467_2020_14806_MOESM1_ESM.pdf]

## Energy consumption and cooperation for optimal sensing: Supplementary Information

Vudtiwat Ngampruetikorn,<sup>1,2</sup> David J. Schwab,<sup>2,3</sup> and Greg J. Stephens<sup>4,5</sup>

<sup>1</sup>*Department of Physics and Astronomy, Northwestern University, Evanston, IL 60208 USA*

<sup>2</sup>*Initiative for the Theoretical Sciences, The Graduate Center, CUNY, New York, NY 10016 USA*

<sup>3</sup>*Center for the Physics of Biological Function, Princeton/CUNY*

<sup>4</sup>*Biological Physics Theory Unit, OIST Graduate University, Okinawa 904-0495, Japan*

<sup>5</sup>*Department of Physics and Astronomy, Vrije Universiteit, 1081HV Amsterdam, The Netherlands*

(Dated: February 3, 2020)

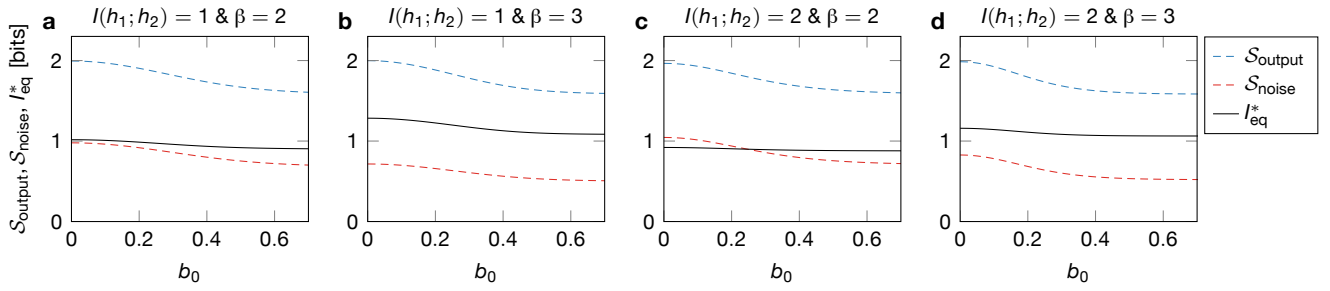

**Supplementary Figure 1.** Intrinsic (signal-independent) sensor biases *decrease* mutual information in optimal equilibrium sensing. We subject two sensors to bivariate Gaussian signals [Eq. (10)] and a signal-independent bias  $b_0$  such that the net bias becomes  $(h_1 + b_0, h_2 - b_0)$ . We then optimise the sensor coupling  $J$  to obtain maximum mutual information and the corresponding noise and output entropies (a-d). We depict the effects of intrinsic biases for four combinations of signal redundancy  $I(h_1; h_2)$  and sensor reliability  $\beta$  (see panel labels), which are representative of the cases where the optimal sensing strategy is equilibrium (a,b) and nonequilibrium (c,d) (see also, Fig. 2b).

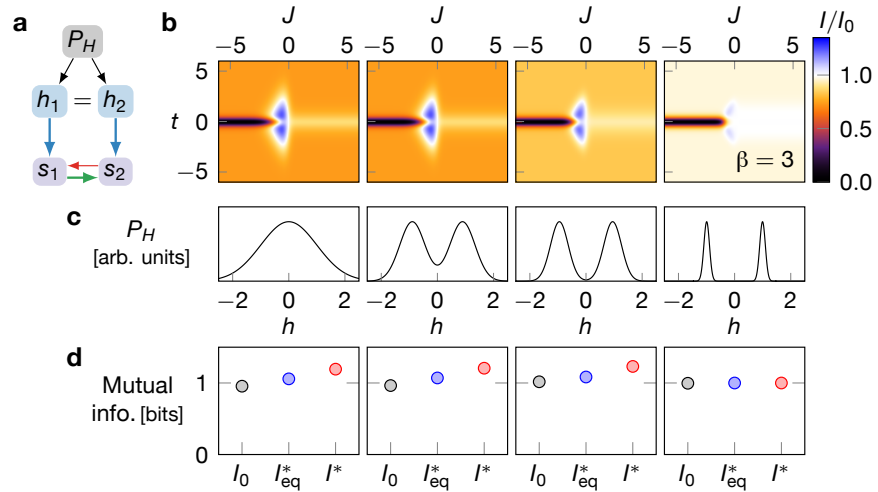

**Supplementary Figure 2.** For highly correlated signals, the nonequilibrium improvement in the low-noise limit does not rely on the specific Gaussian prior. (a) We assume that two sensors are driven by the same bias field  $h \equiv h_1 = h_2$ . (b) The mutual information at sensor reliability of  $\beta = 3$  for four different prior distributions with a zero mean and unit variance, shown in c. For all priors considered, the optimal nonequilibrium drive  $t^*$  is clearly finite, suggesting that the nonequilibrium enhancement is robust for most continuous priors. The dependence of the mutual information on  $J$  and  $t$  remains qualitatively unchanged. This means the mechanism behind the nonequilibrium enhancement is likely to be identical to the one for a Gaussian prior, as described in the main text. (d) The maximum mutual information —  $I_0$ ,  $I_{\text{eq}}^*$  and  $I^*$  — for noninteracting, equilibrium and nonequilibrium sensors, respectively. The nonequilibrium enhancement is visible in all cases except for the most binary-like one (far right).

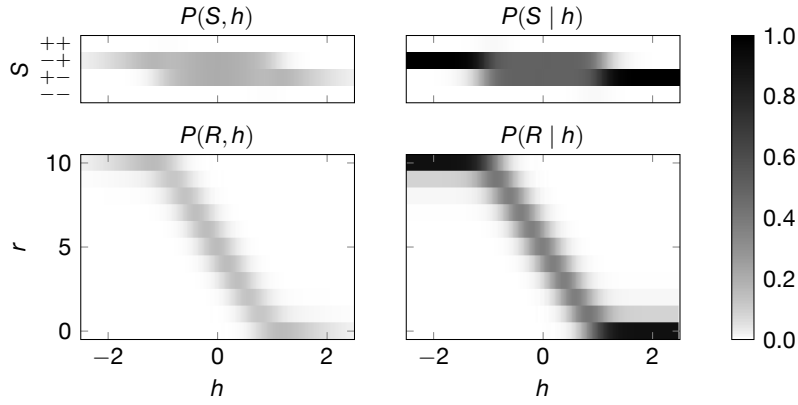

**Supplementary Figure 3.** The ladder structure in Fig. 5e corresponds to the anticorrelated sensor states  $+-$  and  $-+$ . The joint (left) and conditional (right) probability distributions of the sensor states (top) and the readout population (bottom). Here we use, as in Fig. 5e,  $J=-2$ ,  $t=7$ ,  $\delta=-0.6$ ,  $\Delta=1$  and  $r_0=10$ .

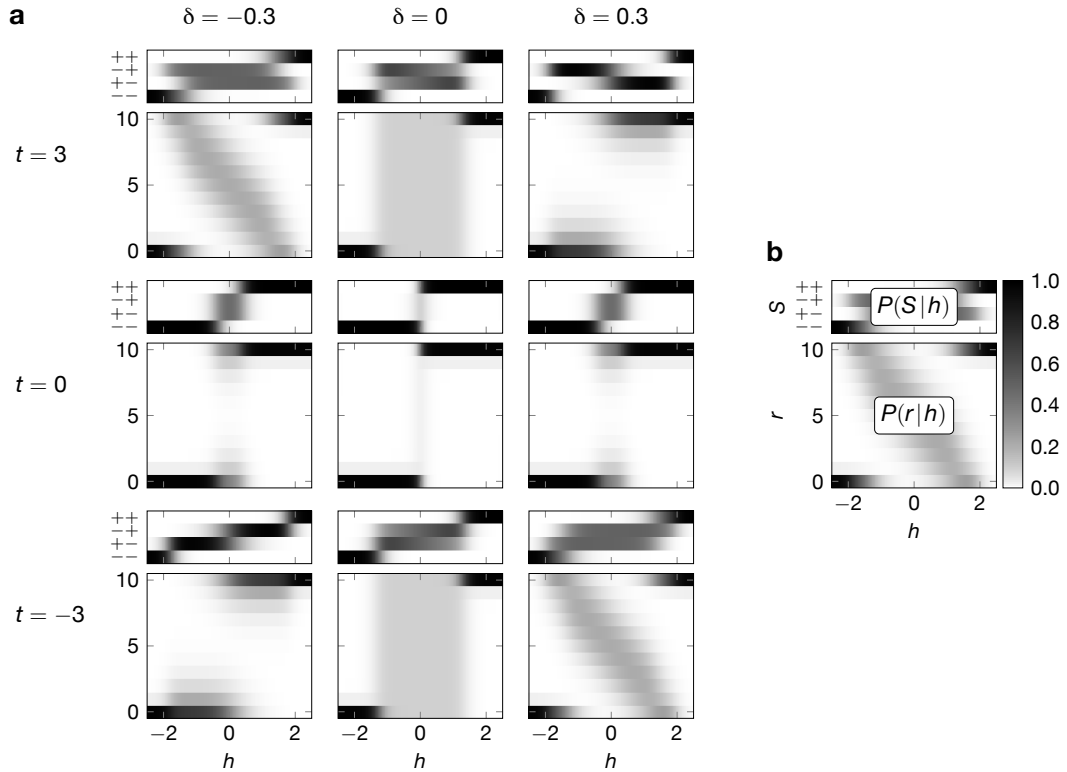

**Supplementary Figure 4.** (a) Conditional probabilities of sensor state and readout given a perfectly correlated signal (see, (b) for legend) at  $J=-2$  and  $\beta=4$  for  $t=3, 0, -3$  (top-to-bottom) and  $\delta=-0.3, 0, 0.3$  (left-to-right). A strong signal  $|h| \gg 1$  favours the correlated sensor states ( $++$  and  $--$ ) and the extreme readout states ( $r=r_0$  and  $r=0$ ), a finite nonequilibrium drive  $t \neq 0$  lifts the degeneracy between the sensor states  $-+$  and  $+-$  (cf. Fig. 4), and  $\delta \neq 0$  differentiates the intermediate readout states ( $0 < r < r_0$ ). The ladder structure in Fig. 5e requires both  $t$  and  $\delta$  to be non-zero. Here we use  $\Delta=1$  and  $r_0=10$ .
